# Supplementary material
Source: publisher figshare collection journal article supplement (https://tandf.figshare.com/articles/dataset/_/8226617)
Supplement: Supplementary file 1 [file 1]

Archive with 3 entries (3 files):
- iijf_a_1567698_sm0113.pdf
- iijf_a_1567698_sm0111.pdf
- iijf_a_1567698_sm0108.pdf
