# Supplementary material
Source: publisher figshare collection journal article supplement (https://tandf.figshare.com/articles/dataset/_/8226617)
Supplement: Supplementary file 1 [file 1 › iijf_a_1567698_sm0108.pdf]

Table S1. Sample size estimation for different combinations of odds ratios and response rates (percentage of people interviewed in 2012 who responded in 2016). Numbers are the minimum number of responders to achieve a significant result for a given odds ratio.

| RESPONSE RATE | ODDS RATIO   |              |              |            |              |              |              |              |              |
|---------------|--------------|--------------|--------------|------------|--------------|--------------|--------------|--------------|--------------|
|               | 1.5          | 1.7          | 1.9          | 2.1        | 2.5          | 2.9          | 3.5          | 4.1          | 4.9          |
| <b>0.1</b>    | 590          | 344.4        | 235.6        | 176.7      | 115.6        | 85.56        | 62.22        | 48.89        | <b>38.89</b> |
| <b>0.2</b>    | 332.2        | 194.4        | 133.3        | 100        | 65.56        | 48.89        | 35.56        | 27.78        | <b>22.22</b> |
| <b>0.3</b>    | 253.3        | 147.8        | 101.1        | 75.56      | 50           | 36.67        | 26.67        | 21.11        | <b>16.67</b> |
| <b>0.4</b>    | 221.1        | 130          | 88.89        | 66.67      | 43.33        | 32.22        | 23.33        | 18.89        | <b>14.44</b> |
| <b>0.5</b>    | 212.2        | 124.4        | 85.56        | 64.44      | 42.22        | 31.11        | 23.33        | 17.78        | <b>14.44</b> |
| <b>0.6</b>    | 221.1        | 130          | 88.89        | 66.67      | 43.33        | 32.22        | 23.33        | 18.89        | <b>14.44</b> |
| <b>0.7</b>    | 253.3        | 147.8        | 101.1        | 75.56      | 50           | 36.67        | 26.67        | 21.11        | <b>16.67</b> |
| <b>0.8</b>    | <b>332.2</b> | <b>194.4</b> | <b>133.3</b> | <b>100</b> | <b>65.56</b> | <b>48.89</b> | <b>35.56</b> | <b>27.78</b> | <b>22.22</b> |
