# Supplementary material
Source: publisher figshare collection journal article supplement (https://tandf.figshare.com/articles/dataset/_/8226617)
Supplement: Supplementary file 1 [file 1 › iijf_a_1567698_sm0111.pdf]

Table S2. Socio-demographic characteristics of subjects stratified by participation to the two editions of the survey: 2016 (respondents) and 2012 (non-respondents). Data are percentages (absolute numbers). P-values refer to the difference between the two editions.

|                                                        | Non-respondents<br>(n=1115) | Respondents (n=167) | P-value |
|--------------------------------------------------------|-----------------------------|---------------------|---------|
| Gender: <i>Male</i>                                    | 38% (424)                   | 28% (47)            | 0.013   |
| Nationality: <i>Chilean</i>                            | 95% (1056)                  | 99% (163)           | 0.075   |
| <i>European</i>                                        | 1% (13)                     | 0% (0)              |         |
| <i>North American</i>                                  | 0% (2)                      | 0% (0)              |         |
| <i>South American (other than Chilean)</i>             | 4% (43)                     | 1% (1)              |         |
| Ethnicity: <i>White</i>                                | 74% (789)                   | 69% (106)           | 0.319   |
| <i>Mapuche</i>                                         | 4% (45)                     | 6% (10)             |         |
| <i>Mestizo</i>                                         | 22% (232)                   | 24% (37)            |         |
| <i>Quechua</i>                                         | 0% (2)                      | 1% (1)              |         |
| Age: 18-24                                             | 12% (133)                   | 7% (12)             | <0.001  |
| 25-34                                                  | 14% (151)                   | 10% (16)            |         |
| 35-44                                                  | 18% (198)                   | 10% (17)            |         |
| 45-54                                                  | 23% (251)                   | 21% (34)            |         |
| 55-64                                                  | 18% (201)                   | 27% (44)            |         |
| 65-74                                                  | 11% (118)                   | 16% (26)            |         |
| 75-84                                                  | 4% (48)                     | 7% (12)             |         |
| 85+                                                    | 0% (5)                      | 2% (3)              |         |
| Married/Cohabitant: <i>Yes</i>                         | 61% (651)                   | 62% (101)           | 0.654   |
| Children: <i>Yes</i>                                   | 73% (810)                   | 80% (134)           | 0.038   |
| Number of family members                               | 3/4/5                       | 3/4/5               | 0.023   |
| Income: high (> 2,000,000 pesos per month)             | 4% (21)                     | 8% (8)              | 0.029   |
| Educational level: <i>Primary school</i>               | 17% (169)                   | 24% (38)            | 0.065   |
| <i>Secondary school</i>                                | 61% (620)                   | 54% (85)            |         |
| <i>Higher education (Bachelor/Master's degree/PhD)</i> | 22% (229)                   | 22% (35)            |         |

|                                  |           |          |       |
|----------------------------------|-----------|----------|-------|
| <i>Job: Manager-professional</i> | 18% (133) | 25% (23) | 0.262 |
| <i>Office-worker</i>             | 38% (273) | 31% (28) |       |
| <i>Workman-artisan</i>           | 38% (276) | 36% (33) |       |
| <i>Odd jobs</i>                  | 5% (38)   | 8% (7)   |       |

---
