# Supplementary material
Source: publisher figshare collection journal article supplement (https://tandf.figshare.com/articles/dataset/_/8226617)
Supplement: Supplementary file 1 [file 1 › iijf_a_1567698_sm0113.pdf]

Table S3. Answers to the main domains of the instrument used for the survey, stratified by participation in the two editions of the survey: 2016 (respondents) and 2012 (non-respondents). Data are percentages (absolute numbers). P-values refer to the difference between the two editions and are adjusted for multiplicity.

|                                                                                                               | Non-respondents<br>(n=1115) | Respondents (n=167) | P-value |
|---------------------------------------------------------------------------------------------------------------|-----------------------------|---------------------|---------|
| <b>Attitudes towards obesity/nutrition and subjects' own initiatives for a healthy lifestyle</b>              |                             |                     |         |
| <u>Obesity perceived as a severe public health burden</u>                                                     | 98% (1096)                  | 98% (164)           | 0.971   |
| <u>Reporting to be obese/overweight</u>                                                                       | 40% (445)                   | 45% (75)            | 0.411   |
| <u>Reporting that at least one family member is obese/overweight</u>                                          | 34% (379)                   | 34% (57)            | 0.971   |
| <u>Reporting to do something to lose weight</u>                                                               | 47% (522)                   | 79% (59)            | 0.001   |
| <u>Strategies employed to build an opinion on healthy nutrition. Physician</u>                                | 39% (158)                   | 55% (92)            | <0.001  |
| Mass media                                                                                                    | 46% (187)                   | 35% (58)            | 0.046   |
| Family/school                                                                                                 | 36% (147)                   | 32% (54)            | 0.63    |
| Personal experience                                                                                           | 31% (127)                   | 37% (61)            | 0.411   |
| <u>Most effective action introduced so far to promote healthy nutrition. School</u>                           | 21% (80)                    | 15% (23)            | <0.001  |
| Food labelling                                                                                                | 19% (71)                    | 35% (53)            |         |
| General practitioner                                                                                          | 24% (92)                    | 24% (37)            |         |
| Advertising                                                                                                   | 36% (134)                   | 26% (40)            |         |
| <u>Physical activity perceived as an important strategy for obesity prevention</u>                            | 97% (1078)                  | 94% (156)           | 0.086   |
| <u>Reporting to regularly do physical activity</u>                                                            | 67% (746)                   | 65% (108)           | 0.763   |
| <u>Reporting to regularly do aerobic exercise</u>                                                             | 36% (353)                   | 65% (70)            | <0.001  |
| <b>Subjects' attitudes towards and understanding of nutritional information reported in pre-packaged food</b> |                             |                     |         |
| <u>Reporting to regularly read FoPL</u>                                                                       | 64% (715)                   | 68% (100)           | 0.63    |
| <u>Reasons for not reading FoPL. Self-reported poor understanding</u>                                         | 26% (36)                    | 31% (15)            | 0.63    |
| Never noticed FoPL                                                                                            | 40% (55)                    | 29% (14)            |         |
| Poor interest in FoPL                                                                                         | 34% (46)                    | 40% (19)            |         |
| <u>Self-reported understanding of nutritional facts</u>                                                       | 75% (204)                   | 73% (73)            | 0.828   |
| <u>Already heard of GDA (Guideline Daily Amount)</u>                                                          | 22% (89)                    | 18% (27)            | 0.63    |

|                                                                                                 |           |           |       |
|-------------------------------------------------------------------------------------------------|-----------|-----------|-------|
| <u>Self-reported understanding of GDA</u>                                                       | 10% (42)  | 10% (15)  | 0.971 |
| <u>Nutritional facts available in FoPL are considered exhaustive</u>                            | 32% (123) | 32% (48)  | 0.971 |
| <u>Words most frequently associated with FoPL. Sugar</u>                                        | 33% (371) | 57% (84)  | 0.001 |
| Fat                                                                                             | 46% (513) | 45% (66)  | 0.917 |
| Calories                                                                                        | 37% (407) | 39% (58)  | 0.727 |
| Servings                                                                                        | 3% (31)   | 0% (0)    | 0.096 |
| Carbohydrates                                                                                   | 16% (179) | 14% (20)  | 0.63  |
| Cholesterol                                                                                     | 18% (200) | 9% (14)   | 0.036 |
| Calcium                                                                                         | 5% (57)   | 5% (8)    | 0.971 |
| Sodium                                                                                          | 33% (367) | 35% (52)  | 0.769 |
| Iron                                                                                            | 4% (40)   | 3% (5)    | 0.971 |
| <u>Correct definition of “per 100 g”</u>                                                        | 27% (291) | 15% (19)  | 0.014 |
| <u>Correct definition of “per 100 Kcal”</u>                                                     | 9% (96)   | 1% (1)    | 0.011 |
| <u>Correct definition of “per portion”</u>                                                      | 18% (195) | 16% (20)  | 0.679 |
| <u>Simplest way to present nutritional facts. "per 100 Kcal"</u>                                | 7% (74)   | 3% (4)    | 0.197 |
| "per 100 grams"                                                                                 | 23% (239) | 20% (28)  |       |
| "per serving"                                                                                   | 70% (722) | 77% (108) |       |
| <u>Best/most effective FoPL. Total Kcal (expressed as percentage of GDA)</u>                    | 8% (34)   | 12% (16)  | 0.046 |
| Total Kcal together with sugar, fat, sodium (expressed as percentages of GDA)                   | 12% (48)  | 11% (15)  |       |
| Battery-shaped front-of-pack labelling                                                          | 10% (39)  | 11% (15)  |       |
| Traffic light                                                                                   | 47% (194) | 32% (45)  |       |
| Symbol of healthy product                                                                       | 23% (94)  | 35% (48)  |       |
| <u>The introduction of traffic light FoPL would not change consumption patterns</u>             | 36% (149) | 47% (66)  | 0.056 |
| <u>The introduction of battery-shaped FoPL would not change consumption patterns</u>            | 45% (171) | 45% (63)  | 0.971 |
| <u>Information employed to estimate the amount of food to eat at mealtimes. Fat per serving</u> | 14% (57)  | 9% (13)   | 0.288 |
| Suggested serving                                                                               | 13% (53)  | 9% (13)   | 0.411 |
| Calories per serving                                                                            | 24% (100) | 15% (21)  | 0.046 |
| FoPL                                                                                            | 6% (26)   | 15% (22)  | 0.001 |

|                                                                                     |           |          |       |
|-------------------------------------------------------------------------------------|-----------|----------|-------|
| None of the information reported in FoPL                                            | 32% (131) | 50% (71) | 0.001 |
| Hunger                                                                              | 11% (44)  | 3% (5)   | 0.035 |
| <u>Problem solving 1: correct identification of the most energy dense food item</u> | 25% (93)  | 24% (28) | 0.96  |
| <u>Problem solving 2: correct identification of the most energy dense food item</u> | 41% (143) | 37% (42) | 0.63  |
| <b>Willingness to pay</b>                                                           |           |          |       |
| <u>Willing to pay an additional fee for more detailed FoPL</u>                      | 20% (144) | 9% (11)  | 0.022 |
